# Supplementary material
Source: Springer Nature journal article supplement (https://www.springermedizin.de/resource/supplementary/12978_2009_76_MOESM1_ESM.pdf/9602836)
Supplement: MOESM1 [file 9602836]

|                                    |
|------------------------------------|
| Macro-social:<br>economic factors  |
| Macro-social: norms<br>and kinship |
| Micro-social:<br>attributes        |
| Micro-social:<br>circumstances     |

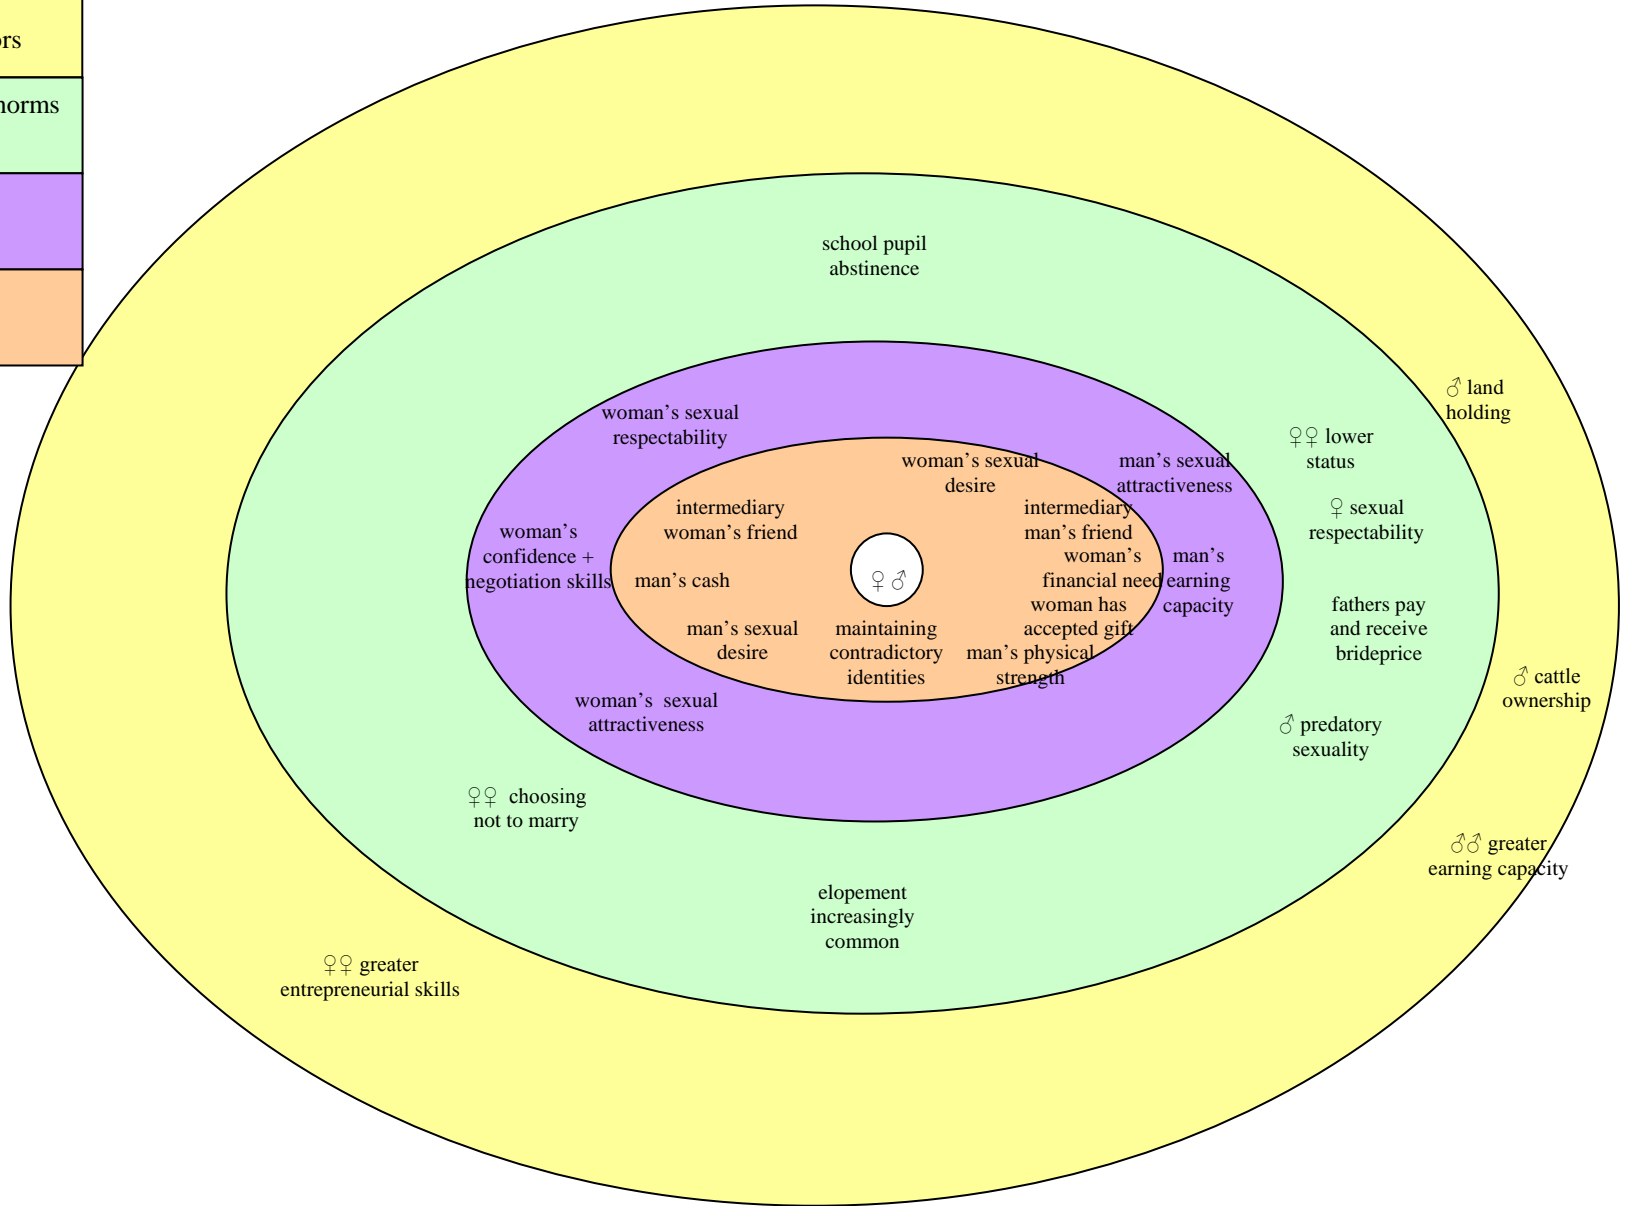

FACTORS  
FAVOURING  
WOMEN

FACTORS  
FAVOURING  
MEN
